## Identification of *Avramr1* from *Phytophthora infestans* using long read and cDNA pathogen-enrichment sequencing (PenSeq)

Xiao Lin<sup>1</sup>, Tianqiao Song<sup>1</sup>, Sebastian Fairhead<sup>1</sup>, Kamil Witek<sup>1</sup>, Agathe Jouet<sup>1</sup>, Florian Jupe<sup>1</sup>, Agnieszka I. Witek<sup>1</sup>, Vivianne G. A. A. Vleeshouwers<sup>2</sup>, Ingo Hein<sup>3</sup> and Jonathan D. G. Jones<sup>1\*</sup>

<sup>1</sup>The Sainsbury Laboratory, Norwich Research Park, Norwich, NR4 7UH, UK; <sup>2</sup>Plant Breeding, Wageningen University and Research, Droevendaalsesteeg 1, 6708 PB. Wageningen, The Netherlands; <sup>3</sup>School of Life Sciences, Division of Plant Sciences, University of Dundee and The James Hutton Institute, Dundee, DD2 5DA, UK

\*Corresponding author:

Jonathan D. G. Jones

Tel: +44 (0)1603 450400

Email: [jonathan.jones@tsl.ac.uk](mailto:jonathan.jones@tsl.ac.uk)

Word count: Total: 3,788 words; Summary: 185; Introduction: 537; Materials and Methods: 957; Results: 1,590; Discussion: 486; Acknowledgements: 33.

Number of Figures: 5 (colour)

Number of Table: 1

Number of supplementary Figures: 2

Number of supplementary Tables: 3

Number of supplementary Notes: 4

Running title: *Avramr1* cloning by long read and cDNA PenSeq

Keywords: *Avramr1*, late blight, oomycete, PenSeq, *Phytophthora infestans*, *Rpi-amr1*, RxLR effector

## 1 Summary

- 2
- 3 • Potato late blight, caused by the oomycete pathogen *Phytophthora infestans*,  
4 significantly hampers potato production. Recently, a new *Resistance to Phytophthora*  
5 *infestans* (*Rpi*) gene, *Rpi-amr1*, was cloned from a wild *Solanum* species, *Solanum*  
6 *americanum*. Identification of the corresponding recognized effector (*Avirulence*, or  
7 *Avr*) genes from *P. infestans* is key to elucidating their naturally occurring sequence  
8 variation, which in turn informs the potential durability of the cognate late blight  
9 resistance.
  - 10 • To identify the *P. infestans* effector recognized by *Rpi-amr1*, we screened available  
11 effector libraries and used long read and cDNA pathogen-enrichment sequencing  
12 (PenSeq) on four *P. infestans* isolates to explore the untested effectors.
  - 13 • By using SMRT and cDNA PenSeq, we identified 47 highly expressed effectors from  
14 *P. infestans*, including PITG\_07569 which triggers a highly specific cell death response  
15 when transiently co-expressed with *Rpi-amr1* in *Nicotiana benthamiana*, suggesting  
16 that PITG\_07569 is *Avramr1*.
  - 17 • Here we demonstrate that long read and cDNA PenSeq enables the identification of  
18 full-length RxLR effector families, and their expression profile. This study has revealed  
19 key insights into the evolution and polymorphism of a complex RxLR effector family  
20 that is associated with the recognition by *Rpi-amr1*.
- 21  
22  
23  
24  
25  
26  
27  
28  
29  
30  
31  
32  
33  
34  
35  
36  
37  
38  
39

## 40 Introduction

41  
42 Potato late blight, caused by the hemi-biotrophic oomycete pathogen *Phytophthora infestans*,  
43 triggered the Irish and European famine in the late 1840s, and still causes severe losses to world  
44 potato production.

45  
46 To reduce losses, breeders sought resistance genes in wild relatives of potato. Early in the 20<sup>th</sup>  
47 century, *Solanum demissum*, a highly resistant hexaploid (2n=72) wild potato was found to be  
48 a useful source of Resistance to *P. infestans* (*Rpi*) genes (Salaman, 1937). Since then, many  
49 resistance traits have been transferred to cultivated potatoes by introgression breeding  
50 (Toxopeus, 1956), and many *Rpi* genes have been cloned from wild potatoes, e.g. *R1*, *R3a*, *R8*,  
51 *Rpi-blb1* and *Rpi-vnt1* (Ballvora *et al.*, 2002; van der Vossen *et al.*, 2003; Huang *et al.*, 2005;  
52 Foster *et al.*, 2009; Pel *et al.*, 2009; Vossen *et al.*, 2016). Unlike wild potatoes, *Solanum nigrum*  
53 and *Solanum americanum* have been reported to be non-hosts for *P. infestans* (Colon *et al.*,  
54 1993). Two *Rpi* genes encoding NLR proteins, *Rpi-amr3* and *Rpi-amr1*, were cloned from *S.*  
55 *americanum* and confer late blight resistance in potato (Witek *et al.*, 2016; 2020).

56  
57 Identification of the recognized effectors for *Rpi-amr3* and *Rpi-amr1* would open the way to  
58 investigate their virulence function and distribution in *P. infestans* populations. Moreover, it  
59 could also help to diagnose *Rpi* gene repertoires in resistant plants, and individually confirm  
60 their activity in genetically modified potatoes carrying multiple *Rpi* genes. In oomycetes, all  
61 the cloned Avr proteins contain a signal peptide and RxLR motif (Rehmany *et al.*, 2005), and  
62 the genomic sequencing of *P. infestans* revealed 563 RxLR effectors in the T30-4 reference  
63 genome (Haas *et al.*, 2009). This enabled a high-throughput effectoromics approach for  
64 functional screening of the candidate effectors in plants (Vleeshouwers *et al.*, 2008; 2011), and  
65 many *Avr* genes were identified by this approach, including *Avrblb1*, *Avrblb2* and *Avrvnt1*  
66 (Vleeshouwers *et al.*, 2008; Oh *et al.*, 2009; Pel, 2010).

67  
68 However, available RxLR effector libraries do not contain recombinant clones of all *P.*  
69 *infestans* RxLR effectors, the effector candidates were defined on the basis of expression  
70 profile, motif analysis and distribution between *P. infestans* races (Vleeshouwers *et al.*, 2008;  
71 Oh *et al.*, 2009; Haas *et al.*, 2009). In total, ~300/563 RxLR effectors were previously cloned  
72 into expression vectors for functional screening (Rietman, 2011).

73

74 To further explore the diversity of RxLR effectors from *P. infestans*, a pathogen enrichment  
75 sequencing (PenSeq) approach was adopted to study allelic variation of RxLR effectors and  
76 population genomics of oomycetes. A bait library of RxLR effectors and some other pathogen-  
77 related genes was synthesized and used for enrichment prior to sequencing (Jouet *et al.*, 2018;  
78 Thilliez *et al.*, 2018). However, the previous PenSeq analyses used Illumina reads and genomic  
79 DNA (gDNA), making it difficult to differentiate individual effector alleles and closely related  
80 paralogs, or to find out which effectors are expressed.

81  
82 Here, to identify the recognized effector of the newly-cloned Rpi-amr1 protein from *S.*  
83 *americanum* (Witek *et al.*, 2020), we screened all currently available RxLR effectors for  
84 recognition but without success. Therefore, we used PenSeq with long read (PacBio) and  
85 cDNA methods, and extended the list of candidate effectors that could be screened. Amongst  
86 these additional candidate RXLR genes, we identified *Avramr1* and defined orthologs and  
87 paralogs from four different isolates of *P. infestans*.

88  
89

## 90 **Materials and Methods:**

91  
92

### 93 **Sample preparation**

94  
95

96 To collect the mycelium of *Phytophthora infestans* for DNA extraction, *P. infestans* strains  
97 were grown on RSA solid medium for 7 days and then moved to Plich liquid media for 14 days.  
98 Mycelia were washed and harvested, freeze-dried using a vacuum pump and stored at -80°C  
99 until DNA or RNA extraction.

100 To collect the infection samples or zoospores for RNA extraction, *P. infestans* strains were  
101 cultured for 10 days on RSA medium. Grown mycelia were covered with cold (4 °C) sterile  
102 water and then incubated at 4-6 °C for 2-3h. The concentration of the inoculum was adjusted  
103 to about 50,000 zoospores/mL and 10 µL drops of inoculum were placed on the detached leaves  
104 of potato plants. Detached leaf assays (DLA) were incubated at 20 °C in high humidity for a  
105 required time post inoculation. Leaf discs of the infection area were collected and stored at -  
106 80°C until DNA or RNA extraction.

107  
108  
109

### 108 **DNA and RNA extraction**

110 DNA was extracted using phenol/chloroform. *P. infestans* mycelium samples or infected leaf  
111 discs were ground into powder in liquid nitrogen. Ground material was resuspended in 500 µl  
112 of Shorty buffer (20% 1M Tris HCl pH 9, 20% 2M LiCl, 5% 0.5M EDTA, 10% SDS 10%, 45%  
113 dH<sub>2</sub>O) and one volume of phenol: chloroform: isoamyl alcohol (25: 24: 1) was added. The  
114 upper aqueous phase containing DNA was mixed with one volume of 100% ice-cold  
115 isopropanol to precipitate DNA. The pellet was washed twice using 70% ethanol, heated at  
116 70°C for 2-5 minutes to completely remove ethanol and resuspended in sterile water.  
117 Resuspended DNA was then heated at 65°C for 20 minutes to inactivate DNases before RNase  
118 treatment was performed (2 µl of 10 mg/ml<sup>-1</sup> RNase A, 37°C, 1h) and RNase A removed by  
119 chlorophorm precipitation. Genomic DNA was resuspended in water and sheared into 3-5 kb  
120 fragments using the S220 Focused-ultrasonicator (Covaris Inc., MA, USA).

121

122 RNA samples were extracted with Direct-zol<sup>TM</sup> RNA MiniPrep kit (Zymo Research, Tustin,  
123 CA, USA) according to the manufacturer's instructions.

124

#### 125 **PacBio and Illumina PenSeq capture**

126

127 PacBio library was constructed with DNA samples from the mycelium of four *P. infestans*  
128 strains, EU\_13\_A2 (2006\_3928A), EC1\_A1 (EC1\_3626), EU\_6\_A1 (2006\_3920A) and US23.  
129 The library construction and target DNA sequence capture were performed according to (Witek  
130 *et al.*, 2016), with minor modifications. Qubit Fluorometer (ThermoFisher, Dubuque, IA, USA)  
131 was used to quantify the barcoded DNA library from each isolate. Equimolar amounts of DNA  
132 from the four individually barcoded samples were pooled to obtain 250 ng of total DNA and  
133 then subjected to sequence capture. A 10x excess of non-adaptor-ligated *P. infestans* DNA at  
134 about 500-1,000 bp was added for the hybridization. The final mixture of the amplicons of the  
135 captured library was further size selected by SageELF electrophoresis system (Sage Science,  
136 MA, USA) according to the instructions of the manufacturer.

137

138 Illumina library was constructed with RNA samples from zoospores of the four *P. infestans*  
139 strains, from the corresponding infected leaf discs harvested at 12 hours post infection (hpi), 1,  
140 2 and 3 days post infection (dpi), and from mycelium of EU\_13\_A2. An Illumina library for  
141 each sample was constructed with KAPA mRNA HyperPrep Kit for Illumina® Platforms  
142 (KR1352 – v5.17) following the manufacturer's instructions. mRNA was fragmented to 300-  
143 400 bp. The barcoded libraries were mixed together at a ratio of 16: 8: 4: 1: 1 for 12 hpi, 1 dpi,  
144 2 dpi, 3 dpi, zoospores and mycelium samples, respectively.

145 Both types of libraries were subjected to sequence capture using the bait library as described  
146 previously (Jouet *et al.*, 2018, Thilliez *et al.*, 2018). Before and after sequence capture, qPCR  
147 was performed on Bio-Rad CFX96 real-time detection system with an input of 1 ng DNA to  
148 assess the efficiency of capture.

## 149 150 **Sequencing**

151  
152 PacBio PenSeq libraries were sequenced at the Earlham Institute (Norwich, UK) using Sequel  
153 platform. Illumina PenSeq cDNA libraries were sequenced at Novogene (Hong Kong, China)  
154 using HiSeq, PE250.

## 155 156 **gDNA PenSeq assembly**

157 PacBio raw reads were processed as described in (Witek *et al.*, 2016) to generate ROI reads  
158 and demultiplexed using custom script (Van de Weyer *et al.*, 2019). Demultiplexed ROI were  
159 assembled using Geneious R8 (<http://www.geneious.com/>) using settings as in (Witek *et al.*,  
160 2016).

## 161 162 **Analysis of cDNA PenSeq**

163 All RxLR effectors from the *P. infestans* reference genome T30-4 were used to generate an  
164 artificial “RxLRome” contig, where RxLR effectors’ sequences were separated by stretches of  
165 500 “Ns”. The contig also contained nine non-RxLR control genes (Jouet *et al.*, 2018). The  
166 cDNA PenSeq reads from all treatments were mapped to the T30-4 RxLRome, and the  
167 expression analyses were performed and visualized using Geneious R10 (Kearse *et al.*, 2012).

## 168 169 **New candidate RxLR effectors**

170  
171 For the previously untested RxLR effectors, we first selected the effectors showing differential  
172 expression at different stages and ranked them based on the raw transcript counts. Next, local  
173 alignment searches (BLAST) were performed against the 563 predicted RxLR effectors (Haas  
174 *et al.*, 2009) to remove the previously tested effectors. This analysis revealed 47 candidate  
175 RxLR effectors which were not included in previous functional study. The 47 RxLR effectors  
176 were synthesized by Twist Bioscience (San Francisco, CA, USA). The signal peptides were  
177 removed, the sequences were domesticated for Golden Gate cloning, and overhangs containing  
178 BsaI restriction sites were added to both ends of all effector sequences.

179

180 All the effectors were cloned into vector pICSL86977 (TSL SynBio) with CaMV 35S promoter  
181 and OCS terminator. The constructs were transformed to *Agrobacterium* strain GV3101 for  
182 agro-infiltration.

183  
184

### 185 **Cell death assay**

186  
187 Transient expression of RxLR effectors and *Rpi-amr1* in *Nicotiana benthamiana* was  
188 performed as described previously (Bos *et al.*, 2006). *Agrobacterium* was infiltrated at  
189 OD<sub>600</sub>=1, and each effector was co-infiltrated with *Rpi-amr1-2273* (Witek *et al.*, 2020). The  
190 cell death phenotype was observed at 4 dpi.

191

### 192 **Data availability**

193 Raw PacBio and cDNA PenSeq read sequences have been deposited in the Sequence Read  
194 Archive (SRA) under BioProject IDs PRJNA623167 and PRJNA598824.

195  
196  
197

## 198 **Results**

199  
200

### 201 **Available recombinant RxLR effector libraries do not contain *Avramr1***

202 To identify *Avramr1*, we tested 278 available RxLR effectors (Table S1) by co-expressing  
203 them with *Rpi-amr1-2273* in *N. benthamiana* (Rietman, 2011; Witek *et al.*, 2020). However,  
204 no effector activated *Rpi-amr1*-dependent HR, so we concluded that *Avramr1* was absent from  
205 the available RxLR effector libraries. Notably, *Avr8* was not originally included in the core  
206 effector selection, because *Avr8* expression goes up earlier than 2 dpi (Jo, 2013), showing that  
207 the criteria adopted to define core effectors did not reveal all recognized effectors.

208

209 To find *Avramr1*, we proposed three hypotheses: 1) *Avramr1* is an RxLR effector but it is not  
210 present in the assembled version of *P. infestans* T30-4 reference genome 2) *Avramr1* is an  
211 RxLR effector but it was not yet tested in previous functional studies/libraries; 3) *Avramr1* is  
212 not a typical RxLR effector. To address hypothesis 1, we performed PacBio PenSeq to  
213 sequence the effector alleles in the four diverse *P. infestans* isolates, EU\_13\_A2 (2006\_3928A),  
214 EC1\_A1 (EC1\_3626), EU\_6\_A1 (2006\_3920A) and US23, all of them avirulent on potato  
215 plants carrying *Rpi-amr1*, it indicates they all carry the recognized effector. To address

216 hypothesis 2, we performed cDNA PenSeq to try to identify other RxLR effectors that are  
217 expressed during infection but not reported or defined in previous functional studies.

218

### 219 **PacBio PenSeq of four *P. infestans* isolates EU\_13\_A2, EC1\_A1, EU\_6\_A1 and US23**

220

221 PacBio gDNA PenSeq was performed on four *P. infestans* isolates of genotypes EU\_13\_A2,  
222 EC1\_A1, EU\_6\_A1 and US23 (Fig. 1a). To evaluate the enrichment efficiency, qPCR was  
223 performed with the DNA pre- and post- capture. In general, the targeted genes of different  
224 length were well enriched at Concentration x time (Cot) value <20, while the untargeted genes  
225 were almost undetectable, with Cot value >27 (Peterson *et al.*, 2002) (Fig. S1). Furthermore,  
226 we found that the capture efficiency was increased by including a 10-fold molar excess of non-  
227 adaptor-ligated fragmented *P. infestans* DNA (500-1,000 bp) in the reannealing reaction, to  
228 reduce the extent to which sequences were recovered due to concatenation of transposon-  
229 containing sequences adjacent to *RxLR* genes. After sequence capture, enrichment of most  
230 effector genes was more efficient when non-adaptor-ligated *P. infestans* DNA was included  
231 (Fig. S1).

232

233 Following the enrichment sequencing, circular consensus sequencing (CCS) reads were  
234 assembled (Fig. 1a) and contigs with fewer than 10 reads were removed. The average length  
235 of the contigs of coverage >10 reads was 7 kb (Table 1), and the size of the largest contig was  
236 over 50 kb. This suggests that the PacBio PenSeq successfully captured the target effector  
237 genes and the adjacent flanking DNA sequences. In total, 1,137, 1,054, 1,283 and 925 contigs  
238 were obtained from EU\_13\_A2, EC1\_A1, EU\_6\_A1 and US23 respectively, of which 687,  
239 650, 741 and 571 contigs contain RxLR effectors. (Table 1, Notes S1-S4). The remaining  
240 contigs contained non-RxLR effectors which were included in the bait library design for other  
241 purposes (Thilliez *et al.*, 2018).

242

243 The PacBio PenSeq data allowed us to detect new RxLR effector alleles from different  
244 haplotypes of various *P. infestans* isolates, and even in polyploid genotypes like EU\_13\_A2  
245 (Li *et al.*, 2017). This dataset can also be used to extensively study allelic variation,  
246 presence/absence (P/A) polymorphism and effector evolution. For example, *Avr1*  
247 (PITG\_16663) and a paralogous *Avr1-like* gene (PITG\_06432) are located on supercontigs  
248 1.51 and 1.8 of the reference T30-4 genome, respectively. The *RI*-breaking clonal lineage  
249 EU\_13\_A2 was reported to have an 18 kb deletion comprising the *Avr1* locus (Cooke *et al.*,



250 2012). Also, the Illumina PenSeq data showed that the *Avr1* locus is missing in EU\_13\_A2,  
251 EC1\_A1 and US23 (Thilliez *et al.*, 2018). We mapped the four *Avr1* contigs from EU\_13\_A2  
252 (contig 192, 261, 296 and 329) to supercontig 1.51 and 1.8, and found that all four contigs map  
253 to the *Avr1-like* supercontig 1.8. Two contigs (contig 261 and 286) mapped to the *Avr1-like*  
254 locus, and two other contigs (contig 192 and 329) mapped to a locus next to *Avr1-like* that was  
255 not previously annotated (Fig. S2), though the genes in those two contigs might be pseudogenes  
256 as the signal peptide is missing in both of them. Additionally, in EU\_6\_A1 and US23, two  
257 *Avr1* contigs did not map to *Avr1* or *Avr1-like* loci of T30-4. Thus, our PacBio PenSeq dataset  
258 can provide means to detect novel RxLR effector paralogs absent from the reference genome.

259

260 As another example, our dataset carries in total 504 of the 563 predicted RxLR effectors from  
261 the reference genome T30-4 (Haas *et al.*, 2009). To investigate P/A polymorphism of RxLR  
262 effectors in the four sequenced isolates, we performed a basic local alignment search (BLAST)  
263 of the 504 effectors against the PacBio contigs, with hits with < 50% coverage defined as absent  
264 (Table S2). We found that 17, 28, 15 and 33 RxLR effectors out of the 504 are missing in  
265 EU\_13\_A2, EC1\_A1, EU\_6\_A1 and US23, respectively.

266

267 Taken together, we have generated a rich dataset that could help to define full length RxLR  
268 effector genes, deliver robust information on alleles and paralogs, and reveal conserved or race-  
269 specific effectors from different isolates. It is available in full in Notes S1-S4.

270

### 271 **cDNA PenSeq enables effector expression detection in early stages of infection**

272

273 To clarify whether the untested effectors might be putative *Avr* genes, we performed cDNA  
274 PenSeq for the four *P. infestans* isolates EU\_13\_A2, EC1\_A1, EU\_6\_A1 and US23, at  
275 different time points post-infection (12 hpi, 1, 2 and 3 dpi) and in mycelium and zoospores  
276 (Fig. 1b). To analyse and visualize the cDNA PenSeq data, we built an artificial DNA sequence  
277 contig ("RxLRome") for the RxLR effectors. In addition, nine non-RxLR genes from the bait  
278 library were included as controls (Jouet *et al.*, 2018; Fig. 2). The cDNA PenSeq reads were  
279 mapped to the RxLRome and gene expression compared over time (Fig. 1b).

280

281 Most of the RxLR effectors which were included in previous effector libraries show an up-  
282 regulation of expression in the early stages of infection (Fig. 2). Some of the untested RxLR  
283 effectors show a similar pattern of expression, and might also represent potential *Avr* genes,

284 while others are poorly expressed in some isolates. The details of the cDNA PenSeq are  
285 available in Table S3.

286

### 287 **Identification of *Avramr1***

288

289 To test if *Avramr1* is among the untested effectors, we selected 47 highly expressed effectors  
290 (Fig. 3) present in all tested lineages that had not previously been investigated. The effectors  
291 were synthesized, cloned into an expression vector with 35S promoter and transformed into  
292 *Agrobacterium* GV3101 for agro-infiltration in *N. benthamiana* (Fig. 4a). All the effectors  
293 were infiltrated alone or co-infiltrated with *Rpi-amr1-2273* (Witek *et al.*, 2020). Among the 47  
294 effectors, PITG\_07569 was the only effector which triggered an HR when co-expressed with  
295 *Rpi-amr1-2273* (Fig. 4b). Hence, we concluded PITG\_07569 is *Avramr1*.

296

### 297 ***Avramr1* homologs in different *P. infestans* isolates and other *Phytophthora* species**

298

299 *Avramr1* is a canonical RxLR effector with RYLR and EER motifs and an N-terminal signal  
300 peptide (Fig. 5b). *Avramr1* locates on supercontig 1.11 of the *P. infestans* reference genome  
301 T30-4. *Avramr1-like* (hereafter *Avramr1L*), a truncated paralog (PITG\_07566) maps adjacent  
302 to *Avramr1* (Fig. 5a and 5b). Two known *Avr* effectors, *Avr8* (PITG\_07558) and *Avrsmir1*  
303 (PITG\_07550), are physically close to the *Avramr1* locus in the T30-4 genome (Fig. 5a)  
304 (Rietman *et al.*, 2012).

305

306 To study the sequence polymorphism of *Avramr1* homologs in *P. infestans*, we used BLAST  
307 to search for *Avramr1* homologs in the PacBio PenSeq assemblies generated in this study. It  
308 revealed that EU\_13\_A2, EC1\_A1, EU\_6\_A1 and US23 carry six, four, three and six *Avramr1*  
309 homologs, respectively. Next, we aligned the corresponding *Avramr1* amino acid sequences  
310 and generated a neighbourhood joining (NJ) tree for phylogenetic analysis (Fig. 6a). Two  
311 *Avramr1* homologs from *Phytophthora parasitica* and *Phytophthora cactorum* were identified  
312 from public database, and they were used as an outgroup (Fig. 5b and 6a). Based on the  
313 phylogenetic tree, we distinguished four *Avramr1* clades, clade A (containing *Avramr1* from  
314 T30-4) and clade C (with *Avramr1L* from T30-4), and two more clades, B and D (Fig. 5a). For  
315 a more detailed analysis, we selected one *Avramr1* homolog from clade B and one from D  
316 (*Avramr1-13B1* and *Avramr1-13D1* from EU\_13\_A2) and aligned them with *Avramr1*  
317 homologs from clade A and C, and with *P. parasitica* and *P. cactorum* homologs. Significant

318 sequence polymorphisms are observed between effectors from different clades (Fig. 5b).  
319 Meanwhile, the *Avramr1* homologs within the same clade are almost identical (Fig. 6a).

320

### 321 **Differential expression of *Avramr1* homologs in different *P. infestans* isolates**

322

323 To investigate the expression patterns of *Avramr1* homologs defined in the PacBio PenSeq  
324 data, we mapped the corresponding cDNA PenSeq reads to the PacBio PenSeq contigs from  
325 EU\_13\_A2, EC1\_A1, EU\_6\_A1 and US23. The transcript per million (TPM) values for each  
326 time point are visualized in Fig. 6b. The clade A homologs *Avramr1-23A1*, *Avramr1-13A1* and  
327 *Avramr1-13A2* are highly expressed at almost all stages, and the *Avramr1* homologs from clade  
328 B show a similar expression pattern. For clade C, some homologs, like *Avramr1-13C*,  
329 *Avramr1-6C1* or *Avramr1L* gene from T30-4, are weakly expressed at all stages. However, two  
330 other *Avramr1L* homologs, *Avramr1-23C1* and *Avramr1-13C2*, show moderately elevated  
331 expression in zoospores, and at 1 dpi and 3 dpi. Interestingly, the *Avramr1* homologs from  
332 clade D, which are missing in the reference genome T30-4, show an intermediate expression  
333 level compared to Clade A, B and Clade C, and most *Avramr1* homologs in Clade D show an  
334 increase in expression at the zoospore stage, and at 1, 2, 3 dpi.

335

336 In summary, our PacBio PenSeq analysis created a rich dataset to reveal new *Avr* variants from  
337 different *P. infestans* isolates, and to quantify their expression profile individually. This  
338 facilitates the analysis of the polymorphism of pathogen effectors and their potential  
339 differential recognition patterns with the corresponding *Rpi* genes (Witek *et al.*, 2020).

340

341

## 342 **Discussion**

343

344 The availability of the *P. infestans* genome sequence enabled a step-change in the rate of  
345 investigation of this pathogen, accelerating the discovery of recognized effectors, and of new  
346 *Rpi* genes (Haas *et al.*, 2009; Vleeshouwers *et al.*, 2008; 2011). However, some questions  
347 remain open. For example, how different are the effector repertoires in different *P. infestans*  
348 isolates? To what extent do they show differential expression between races? The study of  
349 plant *NLR* gene repertoires faces similar challenges, and sequence capture, combined with  
350 long-read sequencing technologies, has enabled the refinement of tools to cost-effectively  
351 investigate diversity, such as RenSeq, SMRT RenSeq, RLP/KSeq and AgRenSeq (Arora *et al.*,

352 2019; Lin *et al.*, 2020; Jupe *et al.*, 2013; Witek *et al.*, 2016). Recently, the pan-NLRome of 65  
353 diverse *Arabidopsis thaliana* accessions was determined by a similar strategy, revealing that  
354 any one accession lacks many of the NLRs found in the species pan-NLRome (Van de Weyer  
355 *et al.*, 2019).

356  
357 Pathogen-enrichment sequencing (PenSeq) was developed to facilitate cost-effective  
358 investigation of pathogen diversity on infected plants, and polymorphism of pathogen effectors  
359 (Jouet *et al.*, 2018; Thilliez *et al.*, 2018). The first PenSeq studies, however, were conducted  
360 using Illumina short reads. This significantly limited their resolving power as many oomycete  
361 genomes are highly heterozygous, and some effectors belong to large gene families with  
362 multiple sequence-related paralogs that can lead to false assemblies (Gilroy *et al.*, 2011; Oliva  
363 *et al.*, 2015).

364  
365 In this study, we combined long read PenSeq and cDNA PenSeq, enabling a detailed analysis  
366 of the RxLR genes and their expression patterns in different *P. infestans* isolates. The cDNA  
367 PenSeq dataset allowed us to define an additional set of 47 RxLR genes expressed during  
368 infection that were not previously investigated. Amongst these, we identified *Avramr1*, which  
369 encodes the cognate recognized effector for *Rpi-amr1* from *S. americanum* (Witek *et al.*, 2020).

370  
371 The long read PenSeq data helped us to obtain full-length RxLR effector haplotypes with their  
372 flanking sequences. This allowed us to distinguish individual alleles from polyploid isolates  
373 like EU\_13\_A2, and also distinct effector paralogs. The sequences flanking the *RxLR* genes  
374 enabled us to understand the possible translocation events and identify new *RxLR* loci. We  
375 were also able to identify multiple new *Avramr1* homologs from different isolates, and  
376 identified a new *Avramr1* Clade D which is not present in T30-4. The PenSeq dataset  
377 constitutes a valuable community resource for investigating the allelic and expression diversity  
378 of multiple recognized effectors.

379  
380 So far, no *Rpi-amr1*-breaking *P. infestans* isolates have been found (Witek *et al.*, 2020), and  
381 therefore we propose that *Avramr1* might be crucial for the virulence of *P. infestans*. The  
382 identification of *Avramr1* will enable us to study its virulence function, its polymorphism in  
383 the *P. infestans* population and its recognition by *Rpi-amr1*. Collectively, these data and  
384 methods will contribute to understanding this fast-evolving and destructive oomycete pathogen,  
385 and to achieving durable late blight resistance in potato.

## 386 Reference

387  
388 **Ballvora A, Ercolano MR, Weiß J, Meksem K, Bormann CA, Oberhagemann P, Salamini**  
389 **F, Gebhardt C. 2002.** The *R1* gene for potato resistance to late blight (*Phytophthora infestans*)  
390 belongs to the leucine zipper/NBS/LRR class of plant resistance genes. *The Plant Journal* **30**:  
391 361–371.

392 **Bos JIB, Kanneganti TD, Young C, Cakir C, Huitema E, Win J, Armstrong MR, Birch**  
393 **PRJ, Kamoun S. 2006.** The C-terminal half of *Phytophthora infestans* RXLR effector AVR3a  
394 is sufficient to trigger R3a-mediated hypersensitivity and suppress INF1-induced cell death in  
395 *Nicotiana benthamiana*. *The Plant Journal* **48**: 165–176.

396 **Colon IT, Eijlander R, Budding DJ, Van Ijzendoorn MT, Pieters MMJ, Hoogendoorn J.**  
397 **1993.** Resistance to potato late blight (*Phytophthora infestans* (Mont.) de Bary) in *Solanum*  
398 *nigrum*, *S. villosum* and their sexual hybrids with *S. tuberosum* and *S. demissum*. *Euphytica* **66**:  
399 55–64.

400 **Cooke DEL, Cano LM, Raffaele S, Bain RA, Cooke LR, Etherington GJ, Deahl KL,**  
401 **Farrer RA, Gilroy EM, Goss EM, et al. 2012.** Genome analyses of an aggressive and invasive  
402 lineage of the Irish potato famine pathogen. *PLoS Pathogens* **8**: e1002940.

403 **Foster SJ, Park T-H, Pel M, Brigneti G, Śliwka J, Jagger L, van der Vossen E, Jones JDG.**  
404 **2009.** *Rpi-vnt1.1*, a *Tm-22* homolog from *Solanum venturii*, confers resistance to potato late  
405 blight. *Molecular Plant-Microbe Interactions* **22**: 589–600.

406 **Gilroy EM, Breen S, Whisson SC, Squires J, Hein I, Kaczmarek M, Turnbull D, Boevink**  
407 **PC, Lokossou A, Cano LM, et al. 2011.** Presence/absence, differential expression and  
408 sequence polymorphisms between *PiAVR2* and *PiAVR2*-like in *Phytophthora infestans*  
409 determine virulence on *R2* plants. *New Phytologist* **191**: 763–776.

410 **Haas BJ, Kamoun S, Zody MC, Jiang RHY, Handsaker RE, Cano LM, Grabherr M,**  
411 **Kodira CD, Raffaele S, Torto-Alalibo T, et al. 2009.** Genome sequence and analysis of the  
412 Irish potato famine pathogen *Phytophthora infestans*. *Nature* **461**: 393–398.

413 **Huang S, van der Vossen EAG, Kuang H, Vleeshouwers VGAA, Zhang N, Borm TJA,**  
414 **Van Eck HJ, Baker B, Jacobsen E, Visser RGF. 2005.** Comparative genomics enabled the  
415 isolation of the *R3a* late blight resistance gene in potato. *The Plant Journal* **42**: 251–261.

416 **Jo KR. 2013.** Unveiling and deploying durability of late blight resistance in potato. PhD thesis,  
417 Wageningen UR.

418 **Jouet A, Saunders DGO, McMullan M, Ben Ward, Furzer O, Jupe F, Cevik V, Hein I,**  
419 **Thilliez GJA, Holub E, et al. 2018.** *Albugo candida* race diversity, ploidy and host-associated  
420 microbes revealed using DNA sequence capture on diseased plants in the field. *New*  
421 *Phytologist* **93**: 959.

422 **Kearse M, Moir R, Wilson A, Stones-Havas S, Cheung M, Sturrock S, Buxton S, Cooper**  
423 **A, Markowitz S, Duran C, et al. 2012.** Geneious Basic: An integrated and extendable desktop  
424 software platform for the organization and analysis of sequence data. *Bioinformatics* **28**: 1647–  
425 1649.

- 426 **Li Y, Shen H, Zhou Q, Qian K, van der Lee T, Huang S. 2017.** Changing ploidy as a strategy:  
427 the Irish potato famine pathogen shifts ploidy in relation to its sexuality. *Molecular Plant-*  
428 *Microbe Interactions* **30**: 45–52.
- 429 **Lin X, Armstrong M, Baker K, Wouters D, Visser RGF, Wolters PJ, Hein I,**  
430 **Vleeshouwers VGAA. 2020.** RLP/K enrichment sequencing; a novel method to identify  
431 receptor-like protein (*RLP*) and receptor-like kinase (*RLK*) genes. *New Phytologist*.  
432 <https://doi.org/10.1111/nph.16608>  
433
- 434 **Oh S-K, Young C, Lee M, Oliva R, Bozkur TO, Cano LM, Win J, Bos JIB, Liu H-Y, van**  
435 **Damme M, et al. 2009.** In planta expression screens of *Phytophthora infestans* RXLR effectors  
436 reveal diverse phenotypes, including activation of the *Solanum bulbocastanum* disease  
437 resistance protein *Rpi-blb2*. *The Plant Cell* **21**: 2928–2947.
- 438 **Oliva RF, Cano LM, Raffaele S, Win J, Bozkur TO, Belhaj K, Oh S-K, THINES M,**  
439 **Kamoun S. 2015.** A recent expansion of the RXLR effector gene *Avrblb2* is maintained in  
440 global populations of *Phytophthora infestans* indicating different contributions to virulence.  
441 *Molecular Plant-Microbe Interactions* **28**: 901–912.
- 442 **Pel M. 2010.** Mapping, isolation and characterization of genes responsible for late blight  
443 resistance in potato. PhD thesis, Wageningen UR.
- 444 **Pel MA, Foster SJ, Park T-H, Rietman H, van Arkel G, Jones JDG, Van Eck HJ,**  
445 **Jacobsen E, Visser RGF, van der Vossen EAG. 2009.** Mapping and cloning of late blight  
446 resistance genes from *Solanum venturii* using an interspecific candidate gene approach.  
447 *Molecular Plant-Microbe Interactions* **22**: 601–615.
- 448 **Peterson DG, Wessler SR, Genetics APTI, 2002. 2002.** Efficient capture of unique sequences  
449 from eukaryotic genomes. *Journal of Integrative Agriculture* **18**: 547–550.
- 450 **Rehmany AP, Gordon A, Rose LE, Allen RL, Armstrong MR, Whisson SC, Kamoun S,**  
451 **Tyler BM, Birch PRJ, Beynon JL. 2005.** Differential recognition of highly divergent downy  
452 mildew avirulence gene alleles by *RPP1* resistance genes from two *Arabidopsis* lines. *The*  
453 *Plant Cell* **17**: 1839–1850.
- 454 **Rietman H. 2011.** Putting the *Phytophthora infestans* genome sequence at work: multiple  
455 novel avirulence and potato resistance gene candidates revealed. PhD thesis, Wageningen UR.
- 456 **Rietman H, Bijsterbosch G, Cano LM, Lee H-R, Vossen JH, Jacobsen E, Visser RGF,**  
457 **Kamoun S, Vleeshouwers VGAA. 2012.** Qualitative and quantitative late blight resistance in  
458 the potato cultivar Sarpo Mira is determined by the perception of five distinct RXLR effectors.  
459 *Molecular Plant-Microbe Interactions* **25**: 910–919.
- 460 **Salaman R. 1937.** *Potato variety production: a new departure.* *Gardeners Chronicle* **102**: 326-  
461 327.
- 462 **Thilliez GJA, Armstrong MR, Lim TY, Baker K, Jouet A, Ben Ward, van Oosterhout C,**  
463 **Jones JDG, Huitema E, Birch PRJ, et al. 2018.** Pathogen enrichment sequencing (PenSeq)  
464 enables population genomic studies in oomycetes. *New Phytologist* **4**: 903.
- 465 **Toxopeus HJ. 1956.** Reflections on the origin of new physiologic races in *Phytophthora*  
466 *infestans* and the breeding for resistance in potatoes. *Euphytica* **5**: 221–356.

467 **Van de Weyer A-L, Monteiro F, Furzer OJ, Nishimura MT, Cevik V, Witek K, Jones**  
468 **JDG, Dangl JL, Weigel D, Bemm F. 2019.** A species-wide inventory of *NLR* genes and alleles  
469 in *Arabidopsis thaliana*. *Cell* **178**: 1260–1272.e14.

470 **van der Vossen E, Sikkema A, Hekkert BTL, Gros J, Stevens P, Muskens M, Wouters D,**  
471 **Pereira A, Stiekema W, Allefs S. 2003.** An ancient *R* gene from the wild potato species  
472 *Solanum bulbocastanum* confers broad-spectrum resistance to *Phytophthora infestans* in  
473 cultivated potato and tomato. *The Plant Journal* **36**: 867–882.

474 **Vleeshouwers VGAA, Raffaele S, Vossen JH, Champouret N, Oliva R, Segretin ME,**  
475 **Rietman H, Cano LM, Lokossou A, Kessel G, et al. 2011.** Understanding and exploiting late  
476 blight resistance in the age of effectors. *Annual Review of Phytopathology* **49**: 507–531.

477 **Vleeshouwers VGAA, Rietman H, Krenek P, Champouret N, Young C, Oh S-K, Wang**  
478 **M, Bouwmeester K, Ben Vosman, Visser RGF, et al. 2008.** Effector genomics accelerates  
479 discovery and functional profiling of potato disease resistance and *Phytophthora infestans*  
480 *avirulence* genes. *PLoS ONE* **3**: e2875.

481 **Vossen JH, van Arkel G, Bergervoet M, Jo K-R, Jacobsen E, Visser RGF. 2016.** The  
482 *Solanum demissum* *R8* late blight resistance gene is an *Sw-5* homologue that has been deployed  
483 worldwide in late blight resistant varieties. *Theoretical and Applied Genetics* **129**: 1785–1796.

484 **Witek K, Jupe F, Witek AI, Baker D, Clark MD, Jones JDG. 2016.** Accelerated cloning of  
485 a potato late blight–resistance gene using RenSeq and SMRT sequencing. *Nature*  
486 *Biotechnology* **34**: 656–660.

487 **Witek K, Lin X, Karki HS, Jupe F, Steuernagel B, Stam R, van Oosterhout C, Fairhead**  
488 **S, Cocker JM, Bhanvadia S, et al. 2020.** A complex non-host resistance locus in *Solanum*  
489 *americanum* recognizes a conserved *Phytophthora* effector. *bioRxiv*: 1–25.

490

## 491 **Acknowledgements:**

492 This research was finance from BBSRC grants BB/P021646/1. We would like to thank  
493 Sophien Kamoun and Joe Win for valuable discussion, and TSL Bioinformatics Team,  
494 SynBio Team and horticultural team for their support.

495

496

497

498

499

500

501

502

503

504 **Table:**

**Table 1. PacBio PenSeq for EU\_13\_A2, EC1\_A1, EU\_6\_A1 and US23**

|                 | <b>Total contigs</b> | <b>RxLR effector</b> | <b>Non_RxLR</b> | <b>Average length (bp)</b> | <b>Minimum length (bp)</b> | <b>Maximum length (bp)</b> |
|-----------------|----------------------|----------------------|-----------------|----------------------------|----------------------------|----------------------------|
| <b>EU_13_A2</b> | 1,137                | 687                  | 450             | 7,732                      | 2,617                      | 30,571                     |
| <b>EC1_A1</b>   | 1,054                | 650                  | 404             | 7,663                      | 2,696                      | 33,203                     |
| <b>EU_6_A1</b>  | 1,283                | 741                  | 542             | 7,463                      | 3,052                      | 50,275                     |
| <b>US23</b>     | 925                  | 571                  | 354             | 7,598                      | 2,648                      | 29,901                     |

505

506

507

508

509

510

511

512

513

514

515

516

517

518

519

520

521

522

523

524



525 **Figures:**

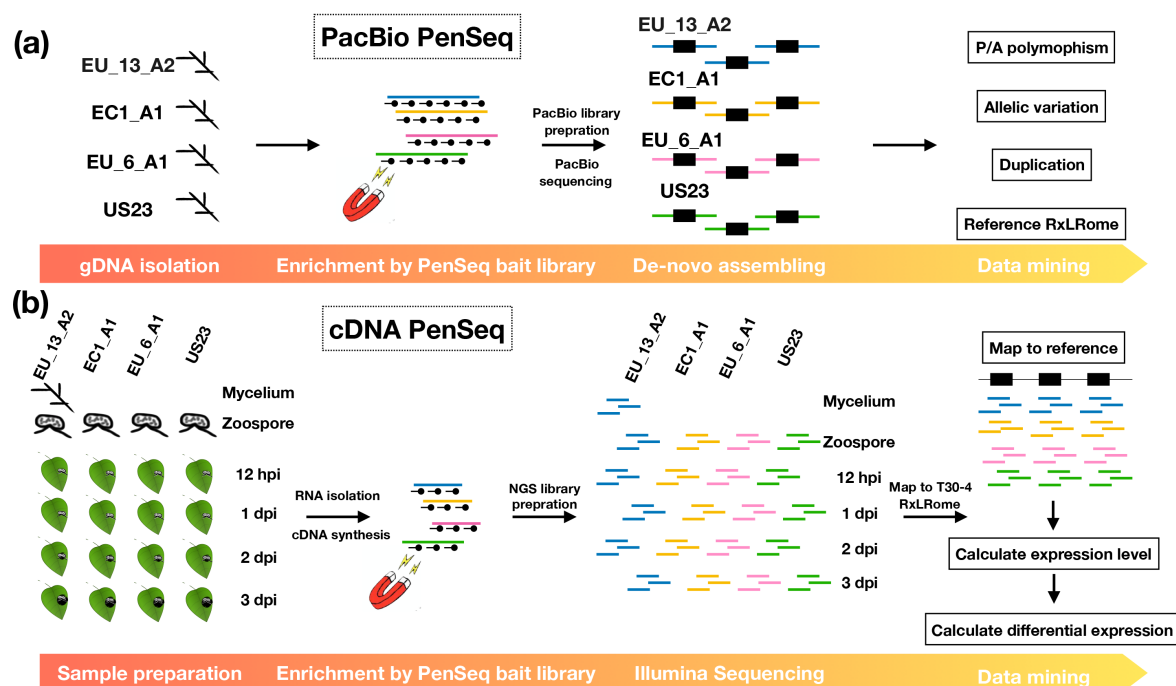

526

527 **Fig. 1 The pipelines of PacBio and cDNA PenSeq.**

528 (a) The pipeline of PacBio gDNA PenSeq. Briefly, the gDNA isolated from various  
 529 *Phytophthora infestans* was enriched for RxLR effectors, sequenced by PacBio and de-  
 530 novo assembled for data mining.

531 (b) The pipeline of cDNA PenSeq. The cDNA were synthesized using RNA sampled from  
 532 various *P. infestans* at different stages (mycelium, zoospore, 12 hpi, 1, 2 and 3 dpi).  
 533 The libraries enriched for RxLR effectors were sequenced, reads were mapped to the  
 534 RxLRome of the reference *P. infestans* genome T30-4 and the expression levels of  
 535 samples were calculated and compared.

536 Black lines with dots represent the baits, the enriched fragments are depicted in blue  
 537 (EU\_13\_A2), yellow (EC1\_A1), pink (EU\_6\_A1) and green (US23). The black boxes  
 538 indicate RxLR effectors. EU\_13\_A2, EC1\_A1, EU\_6\_A1, US23, *P. infestans* genotypes.

539

540

541

542

543

544

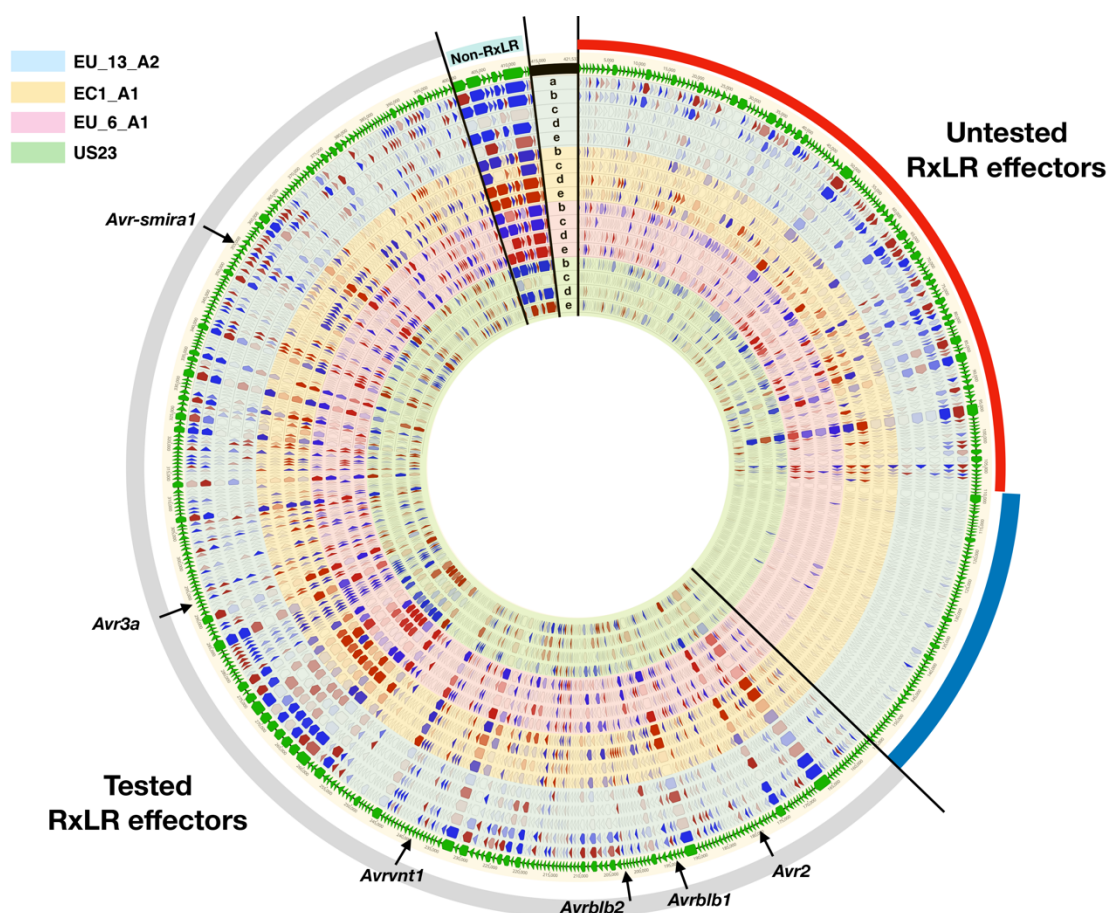

545

546 **Fig. 2 cDNA PenSeq of RxLR effectors from EU\_13\_A2, EC1\_A1, EU\_6\_A1 and US23**

547

548 The cDNA PenSeq data for the RxLR effectors from four *Phytophthora infestans* at different  
 549 stages were mapped to an artificial contig (RxLRome) of 499 RxLR effectors and nine non-  
 550 RxLR genes, demarcated by bright green arrows on the outer edge of the diagram. Black lines  
 551 separate the previously tested RxLR effectors (grey bar), new effector candidates with  
 552 differential expression (red bar), unexpressed effectors (blue bar) and non-RxLR controls  
 553 (cyan). The concentric circles in blue, yellow, pink and green represent data from *P. infestans*  
 554 EU\_13\_A2, EC1\_A1, EU\_6\_A1 and US23, respectively. The arrows on them indicate  
 555 differential expression (red, up-regulation, blue, down-regulation; no fill, no difference), where  
 556 the more intense the colour, the bigger the difference. The data are plotted as follows: a,  
 557 mycelium vs zoospores (for EU\_13\_A2 only); b, zoospores vs 12 hpi; c, 12 hpi vs 1 dpi; d, 1  
 558 dpi vs 2 dpi; e, 2 dpi vs 3 dpi. Six known *Avr* genes, *AvrSmira1*, *Avr3a*, *Avrvt1*, *Avrblb2*,  
 559 *Avrblb1* and *Avr2* are indicated by black arrows.

560

561

562

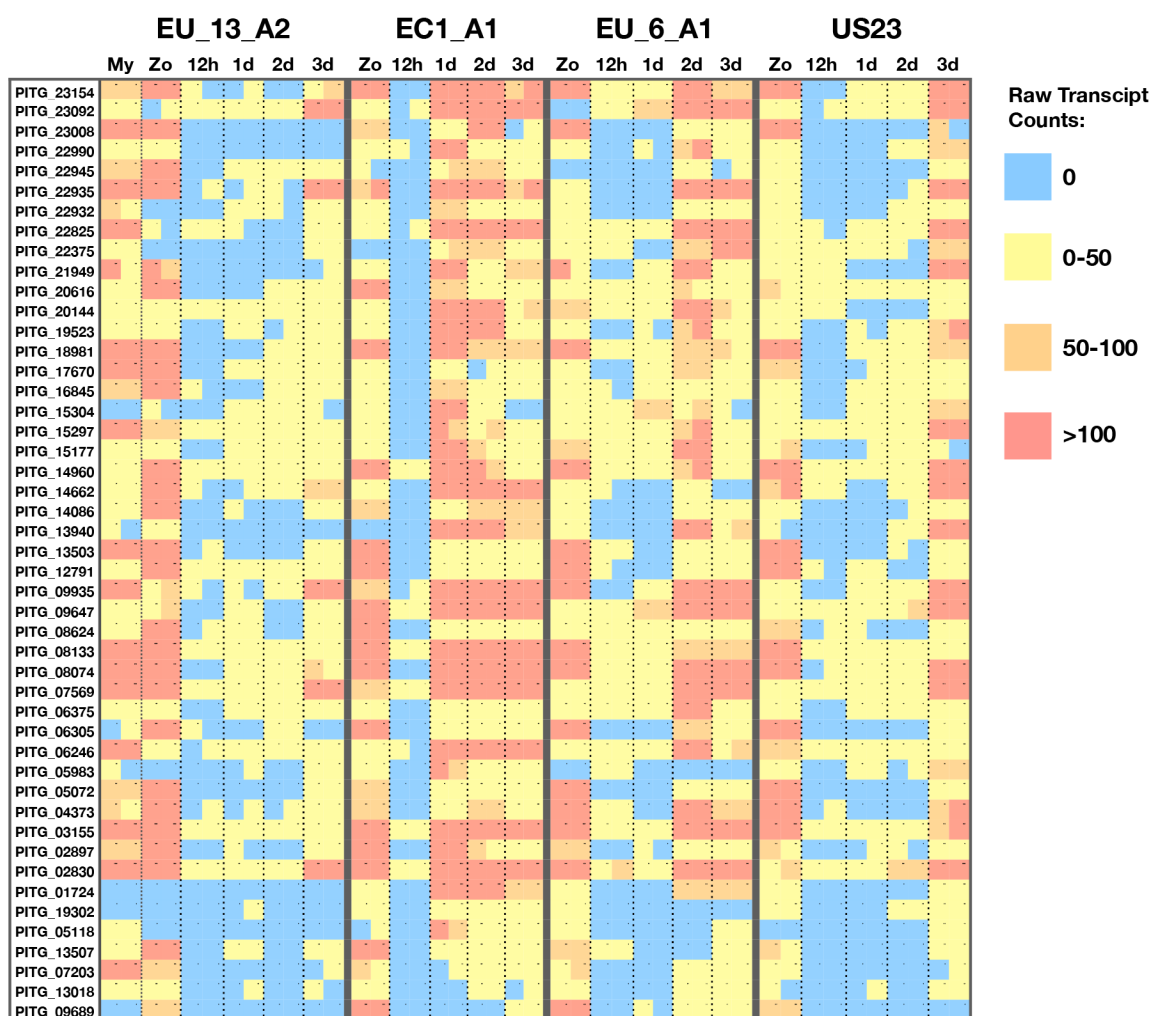

563

564 **Fig. 3 Raw transcript counts for the new candidate RxLR effectors.**

565

566 47 most differentially expressed RxLR effectors from the previously untested set were selected,

567 and the raw transcript counts were visualized as a heat map across time points and treatments.

568 Each square indicates a single data point derived from two independent biological replicates.

569 The colours red, orange, yellow and blue represent >100, 50-100, 0-50, or 0 raw transcripts,

570 respectively.

571

572

573

574

575

576

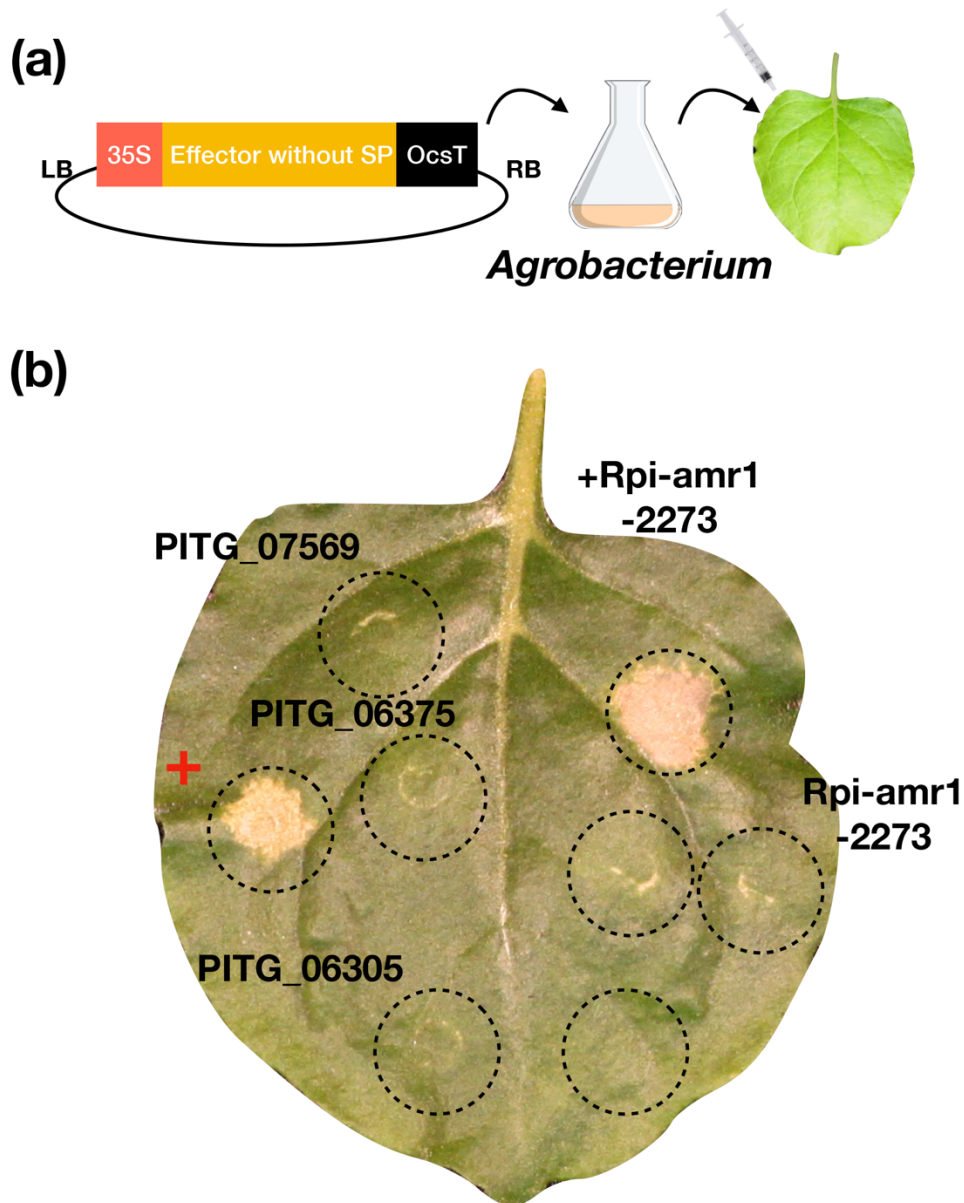

577

578 **Fig. 4 Identification of *Avramr1*.**

579 (a) All 47 selected effectors without signal peptides (SP) were synthesized and cloned into  
580 an expression vector under CaMV-35S promoter for *Agrobacterium*-mediated transient  
581 expression.

582 (b) Transient expression of candidate effectors on their own or with *Rpi-amr1-2273* in  
583 *Nicotiana benthamiana*. Dashed circles demarcate the infiltration sites. Only  
584 PITG\_07569 triggers HR when co-expressed with *Rpi-amr1-2273*. All other effectors  
585 that did not trigger HR are represented by PITG\_06375 and PITG\_06305. A known  
586 *R/Avr* gene pair was used as positive control (+). This experiment was repeated more  
587 than 10 times with the same results.

588

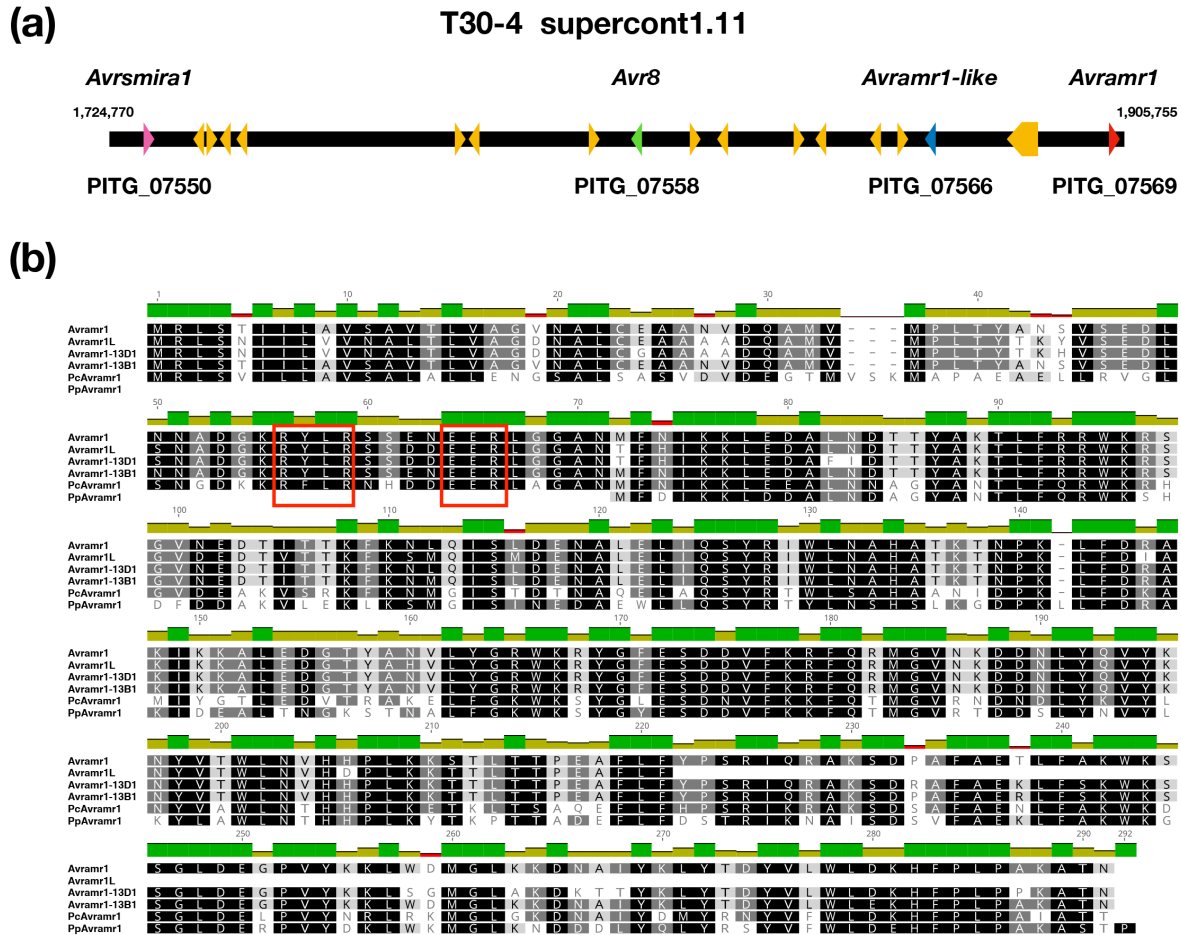

**Fig. 5 Genomic localization and amino-acid alignment of *Avramr1*.**

(a) The localization of *Avramr1* (PITG\_07569, red arrow) on supercontig 1.11 of the reference *Phytophthora infestans* T30-4 genome. A paralog *Avramr1L* gene (PITG\_07566, blue arrow) is located close to *Avramr1*. The supercontig contains another two known *Avr* genes, *Avrsmira1* (PITG\_07550, pink arrow) and *Avr8* (PITG\_07558, green arrow).

(b) The alignment of protein sequences of *Avramr1* and selected homologs and paralogs from *P. infestans*, *P. capsici* (Pc) and *P. palmivora* (Pp). The dark green bars on top of the alignment indicate 100 % identity while olive green and red bars indicate various degrees of polymorphism between the sequences. RxLR and EER motifs are highlighted by red boxes.

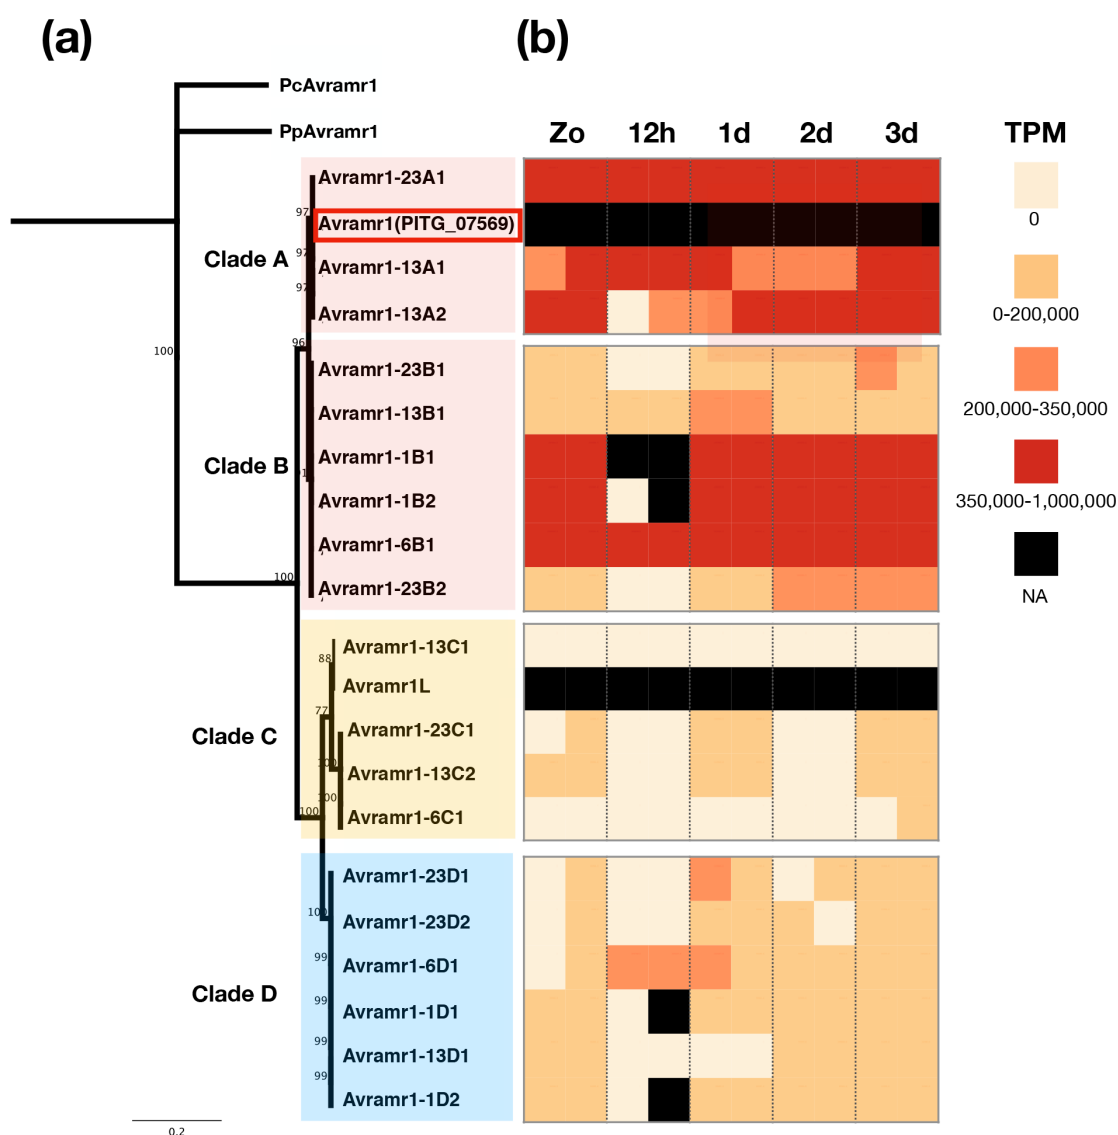

606

607 **Fig. 6 Phylogeny and expression profile of *Avramr1* homologs from EU\_13\_A2, EC1\_A1,**  
 608 **EU\_6\_A1 and US23.**

609

610 (a) Neighbor joining tree of the protein sequences of the *Avramr1* homologs. *Pc-Avramr1*  
 611 and *Pp-Avramr1* were used as outgroups.

612 (b) The expression profile of *Avramr1* homologs at different stages and time points  
 613 (zoospores, 12hpi, 1, 2 and 3 dpi). Transcripts per kilobase million (TPM) for each  
 614 effector homologs were visualized as follows: black, data not available; red, 350,000-  
 615 1,000,000 TPM; orange, 200,000-350,000 TPM; yellow, 0-200,000 TPM; beige, 0  
 616 TPM.

617

618

619 **Supporting Information:**

620

621 **Notes S1:** PacBio PenSeq contigs of EU\_13\_A2.

622 **Notes S2:** PacBio PenSeq contigs of EC1\_A1.

623 **Notes S3:** PacBio PenSeq contigs of EU\_6\_A1.

624 **Notes S4:** PacBio PenSeq contigs of US23.

625 **Table S1:** 278 RxLR effectors from previously available effector libraries.

626 **Table S2:** P/A polymorphism of RxLR effectors from EU\_13\_A2, EC1\_A1, EU\_6\_A1 and

627 US23.

628 **Table S3:** cDNA PenSeq for EU\_13\_A2, EC1\_A1, EU\_6\_A1 and US23.

629 **Fig. S1:** Enrichment efficiency with/ without non-adaptor-ligated DNA.

630 **Fig. S2:** Compare EU\_13\_A2 *Avr1* contigs and the T30-4 reference genome.

631

632

633

634

635

636
